# Supplementary material
Source: publisher figshare collection journal article supplement (https://karger.figshare.com/ndownloader/files/28969593)
Supplement: Supplementary file 1 [file 28969593]

**Supplemental Material Table A: Embitterment and Corona: Comparison of study sample with representative general population data**

|  | **Study Sample** | **General Population** |
| --- | --- | --- |
| Age | M=47.43  SD=13.60 | Federal Statistical Agency, 2020 [1,2]:  M=44.5 (Total)  M=45.6 (German)  M=36.9 (other Nationality) |
| Gender: % of women | 58.1 % | Federal Statistical Agency, 2020 [1,2]:  50.66 % |
| School graduation | No school-leaving qualification=0,1 %  Class 8=0.6 %  Class 9=5.5 %  Class 10=19.4 %  High School/class 12=74,4 % | Federal Statistical Agency, 2019 [3}:  No school-leaving qualification=4,0%  still in school =.,5 %  class 9 =28.6 %  Class 10 =33.5 %  High School/Class 12=33.5 % |
| Professional degree | Apprenticeship=33.9 %  Master of Crafts=6.0 %  Bachelor/Master/Diploma=48.7 %  PhD or MD=5.6 %  No professional degree=5.8 % | Federal Statistical Agency, 2019 [4]:  Apprenticeship=6.6 %  Master of Crafts=9.3 %  Bachelor/Master/Diploma=17.3 %  PhD or MD=1.2 %  No professional degree=25.2 % |
| Relationship status | married=47.6 %  partnership=21.6 %  widowed=1.7 %  divorced=8.7 %  single=20.4 % | Federal Statistical Agency, 2019 [4]:  married=40.1 %  widowed=12.4 %  divorced=12.1 %  single=35.3 % |
| Mental health | 29.9 % mental health problem | Busch et al., 2016 [5]:  27.8 % mental disorders |
| Physical health | "Compared to the time before Corona - how do you rate your physical health?“  „much worse“ (1)=1.3 %  „bad“ (2)=43.4 %  „unchanged“ (3)=37.9 %  „better“ (4)=6.3 %  „much better“ (5)=1.0 %  Scale 1-5  M=2.42  SD=0.81 | Federal Statistical Agency, 2019 [6]:  Self-assessment physical health before Corona:  „very bad“=1.4 %  „bad“=6.9 %  „medium“=26.5 %  „good“=47.2 %  „very good“=18.0 % |
| Embitterment PTED | M=1.32  SD=1.01  16% have high embitterment scores (M>=2.5) | Muschalla et al., 2020 [7]: representative data from 2019:  4% have high embitterment scores (M>=2.5) |
| Wellbeing WHO-5 | sum value=7.43  SD=2.98  M=1.49  SD=0.61  Scale 0-5 | Albani et al., 2007 [8]:  norm sample:  sum value=18-19  Value less than 13 indicates depressive symptoms.  Range 0-25  Scale 0-5  Sischka & Steffgen, 2017 [9]:  Employee well-being, European country comparison (2017):  PR (Germany)=71  PR (Switzerland)=72.5  PR (Austria)=72.5  Range 0-100  Scale 0-5 |
| Resilience RS-13 | sum value=70.20  SD=11.32  Scale 1-7 | Leppert et al., 2008 [10]:  norm sample:  PR=50 = sum value=72  Range 25-175  Scale 1-7 |
| Wisdom WD-12 | M=3.68  SD=0.50  Scale 0-5 | Linden et al., 2018 [11]:  Patients with mental disorders  M=3.50  SD=0.71  Scale 0-5 |

**References to Supplemental Material Table A**

1. Federal Statistical Agency. Durchschnittsalter nach Geschlecht und Staatsangehörigkeit 2011 bis 2019. Destatis, 2020. <https://www.destatis.de/DE/Themen/Gesellschaft-Umwelt/Bevoelkerung/Bevoelkerungsstand/Tabellen/durchschnittsalter-zensus-jahre.html>, retrieved 06.01.2021.
2. Federal Statistical Agency. Bevölkerungsstand. Destatis, 2021. <https://www.destatis.de/DE/Themen/Gesellschaft-Umwelt/Bevoelkerung/Bevoelkerungsstand/_inhalt.html>, retrieved 06.01.2021.
3. Federal Statistical Agency. Bevölkerung im Alter von 15 Jahren und mehr nach allgemeinen und beruflichen Bildungsabschlüssen nach Jahren. Destatis, 2021. <https://www.destatis.de/DE/Themen/Gesellschaft-Umwelt/Bildung-Forschung-Kultur/Bildungsstand/Tabellen/bildungsabschluss.html>, retrieved 06.01.2021.
4. Federal Statistical Agency. Bevölkerung und Erwerbstätigkeit - Haushalte und Familien Ergebnisse des Mikrozensus. Destatis, 2019. <https://www.destatis.de/DE/Themen/Gesellschaft-Umwelt/Bevoelkerung/Haushalte-Familien/Publikationen/Downloads-Haushalte/haushalte-familien-2010300197004.pdf?__blob=publicationFile>, retrieved 06.01.2021.
5. Busch MA, Gaebel W, Gerschler A, Hapke U, Höfler M, Jacobi F, Mack, Maier W, Maske US, Scholl L, Strehle J, Wagner M, Wittchen HU, Zielasek J. Erratum zu: Psychische Störungen in der Allgemeinbevölkerung. Studie zur Gesundheit Erwachsener in Deutschland und ihr Zusatzmodul „Psychische Gesundheit“ (DEGS1-MH). Nervenarzt. 2016;87:88-90. <https://www.destatis.de/DE/Themen/Gesellschaft-Umwelt/Bevoelkerung/Haushalte-Familien/Publikationen/Downloads-Haushalte/haushalte-familien-2010300197004.pdf?__blob=publicationFile>, retrieved 06.01.2021.
6. Federal Statistical Agency. Selbsteinschätzung des Gesundheitszustandes nach Altersgruppen und Geschlecht. Destatis, 2019. <https://www.destatis.de/DE/Themen/Gesellschaft-Umwelt/Gesundheit/Gesundheitszustand-Relevantes-Verhalten/Tabellen/gesundheitszustand-selbsteinschaetzung.html>, retrieved 06.01.2021.
7. Muschalla B, Grove H, Morawietz J. Capacities, Work Anxiety and Embitterment in the General Population. A Representative Survey. Braunschweig: Technische Universität Braunschweig, Psychotherapie und Diagnostik. 2020. DOI: [10.13140/RG.2.2.31438.28485](https://www.researchgate.net/deref/http%3A%2F%2Fdx.doi.org%2F10.13140%2FRG.2.2.31438.28485?_sg%5B0%5D=gAh5x0RYV7txVlcX-DV53OLBMVpW0ymf8dfVAo-qRxreBKcWYYtiX6MlPNzLMJRAdcgVDNWl6eyUTUkRHy0Es1Zysg.VGUuoW_9d-w9IPYBD7mg5kZ1h_bTHpSxPb1yCCesWbA0DXMeBj-vddVaiGCiNJgkqRG61vEi_71DwZ9RjEWKEA), retrieved 06.01.2021.
8. Albani C, Brähler E, Mühlan H, Schmidt S. Teststatistische Prüfung und Normierung der deutschen Versionen des EUROHIS-QOL Lebensqualität-Index und des WHO-5 Wohlbefindens-Index. Diagnostica. 2007;2:83–96. <https://www.academia.edu/22244967/Teststatistische_Pr%C3%BCfung_und_Normierung_der_deutschen_Versionen_des_EUROHIS_QOL_Lebensqualit%C3%A4t_Index_und_des_WHO_5_Wohlbefindens_Index>, retrieved 06.01.2021
9. Sischka P, Steffgen G. Wohlbefinden von Arbeitnehmern in Luxemburg. 2017, <https://www.researchgate.net/publication/329809817_Wohlbefinden_von_Arbeitnehmern_in_Luxemburg>, retrieved 06.01.2021
10. Leppert K, Koch B, Brähler E, Strauß B. RS-13. Die Resilienzskala (RS) – Überprüfung der Langform RS-25 und einer Kurzform RS-13. Göttingen: Vandenhoeck & Ruprecht GmbH & Co. KG, 2008.
11. Linden M, Lieberei B, Noack N. Weisheitseinstellungen und Lebensbewältigung bei psychosomatischen Patienten [Wisdom Attitudes and Coping In Life of Psychosomatic Patients]. Psychother Psychosom Med Psychol. 2019 Aug;69(8):332-38. doi: 10.1055/a-0813-2040
